# Supplementary material
Source: Elsevier journal article supplement (https://rcastoragev2.blob.core.windows.net/19ff21627bf9006ffeaf028899428a7f/mmc1.pdf)
Supplement: mmc1 [file mmc1.pdf]

## Supplemental Information

### Cellular Differentiation of Human Monocytes

### Is Regulated by Time-Dependent Interleukin-4

### Signaling and the Transcriptional Regulator NCOR2

Jil Sander, Susanne V. Schmidt, Branko Cirovic, Naomi McGovern, Olympia Papantonopoulou, Anna-Lena Hardt, Anna C. Aschenbrenner, Christoph Kreer, Thomas Quast, Alexander M. Xu, Lisa M. Schmidleithner, Heidi Theis, Lan Do Thi Huong, Hermi Rizal Bin Sumatoh, Mario A.R. Lauterbach, Jonas Schulte-Schrepping, Patrick Günther, Jia Xue, Kevin Baßler, Thomas Ulas, Kathrin Klee, Natalie Katzmarski, Stefanie Herresthal, Wolfgang Krebs, Bianca Martin, Eicke Latz, Kristian Händler, Michael Kraut, Waldemar Kolanus, Marc Beyer, Christine S. Falk, Bettina Wiegmann, Sven Burgdorf, Nicholas A. Melosh, Evan W. Newell, Florent Ginhoux, Andreas Schlitzer, and Joachim L. Schultze

# Supplementary figure 1

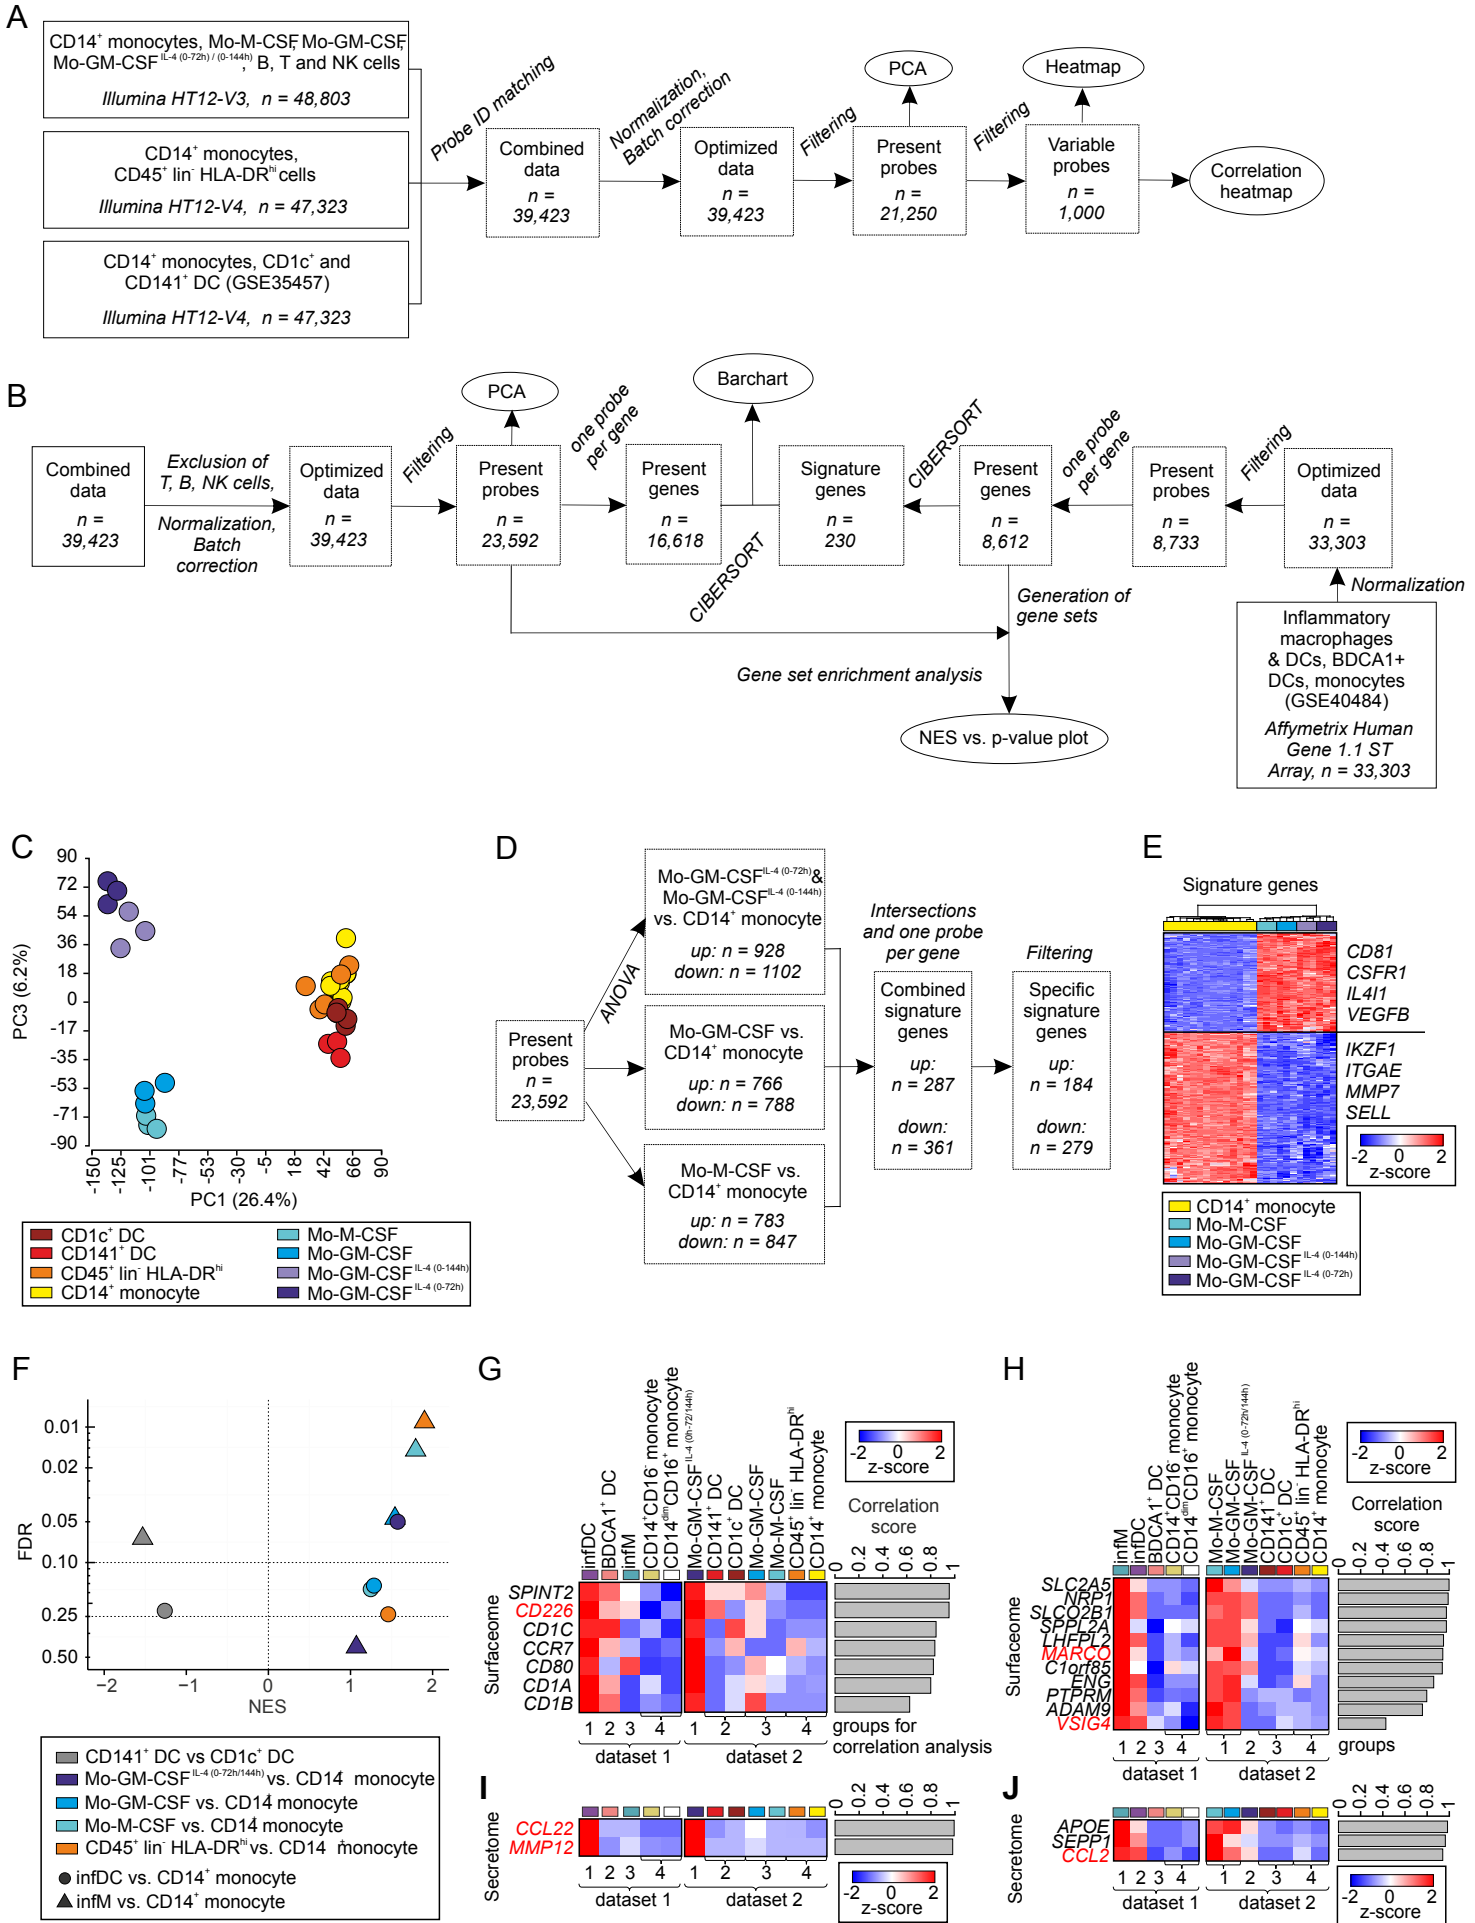

1 **Figure S1 related to Figure 1**  
2 **Relationship of *in vitro* activated monocyte-derived cells. (A-B)** Analysis workflows for  
3 Figure 1 and S1 for datasets (A) with T, B and NK cells or (B) without. (C) PCA based on  
4 23,952 present probes. Displayed are PCs 1 versus 3. (D) Workflow to identify specifically  
5 expressed genes in monocyte-derived cells compared to monocytes, or vice versa. (E)  
6 Heatmap of specifically expressed genes in monocyte-derived cells compared to monocytes,  
7 or vice versa. Z-transformed log<sub>2</sub>-expression values scaled to a minimum of -2 (blue) and a  
8 maximum of 2 (red). Important genes of each group are depicted next to the heatmap. (F)  
9 Scatterplot showing the normalized enrichment score (NES, x-axis) versus the false discovery  
10 rate (FDR, y-axis) obtained after GSEA. Gene sets were comprised of specifically expressed  
11 genes in infM or infDCs compared to CD14<sup>+</sup> monocytes, respectively. Enrichments were  
12 estimated for pairwise comparisons of monocyte-derived cells versus CD14<sup>+</sup> Monocytes, and  
13 for the comparison of CD141<sup>+</sup> versus CD1c<sup>+</sup> DCs. (G-J) Heatmaps of genes encoding (G, H)  
14 surface markers or (I, J) secreted molecules specifically expressed in (G, I) infDCs  
15 compared to infM, BDCA1<sup>+</sup> DCs and monocytes (left, dataset 1), as well as in Mo-GMCSF<sup>IL4</sup>  
16 <sup>(0-72h)</sup> cells compared to all other investigated monocyte-derived cells, CD14<sup>+</sup> monocytes and  
17 DCs (right, dataset 2), or in (H, J) infM compared to infDCs, BDCA1<sup>+</sup> DCs and monocytes  
18 (left, dataset 1), as well as in Mo-GMCSF and Mo-MCSF cells compared to Mo-GMCSF<sup>IL4(0-</sup>  
19 <sup>72h)</sup> cells, CD14<sup>+</sup> monocytes and DCs (right, dataset 2). Pearson correlation values were  
20 calculated between the indicated group patterns of dataset 1 versus dataset 2 and displayed as  
21 a barplot next to the heatmaps. Genes encoding (G, H) surface markers or (I, J) secreted  
22 molecules are displayed, with a correlation of at least 0.4 between the corresponding two  
23 datasets. Genes further analyzed in Figure 1 I-K are highlighted in red. Z-transformed log<sub>2</sub>-  
24 expression values were and scaled to a minimum of -2 (blue) and a maximum of 2 (red).  
25

# Supplementary figure 2

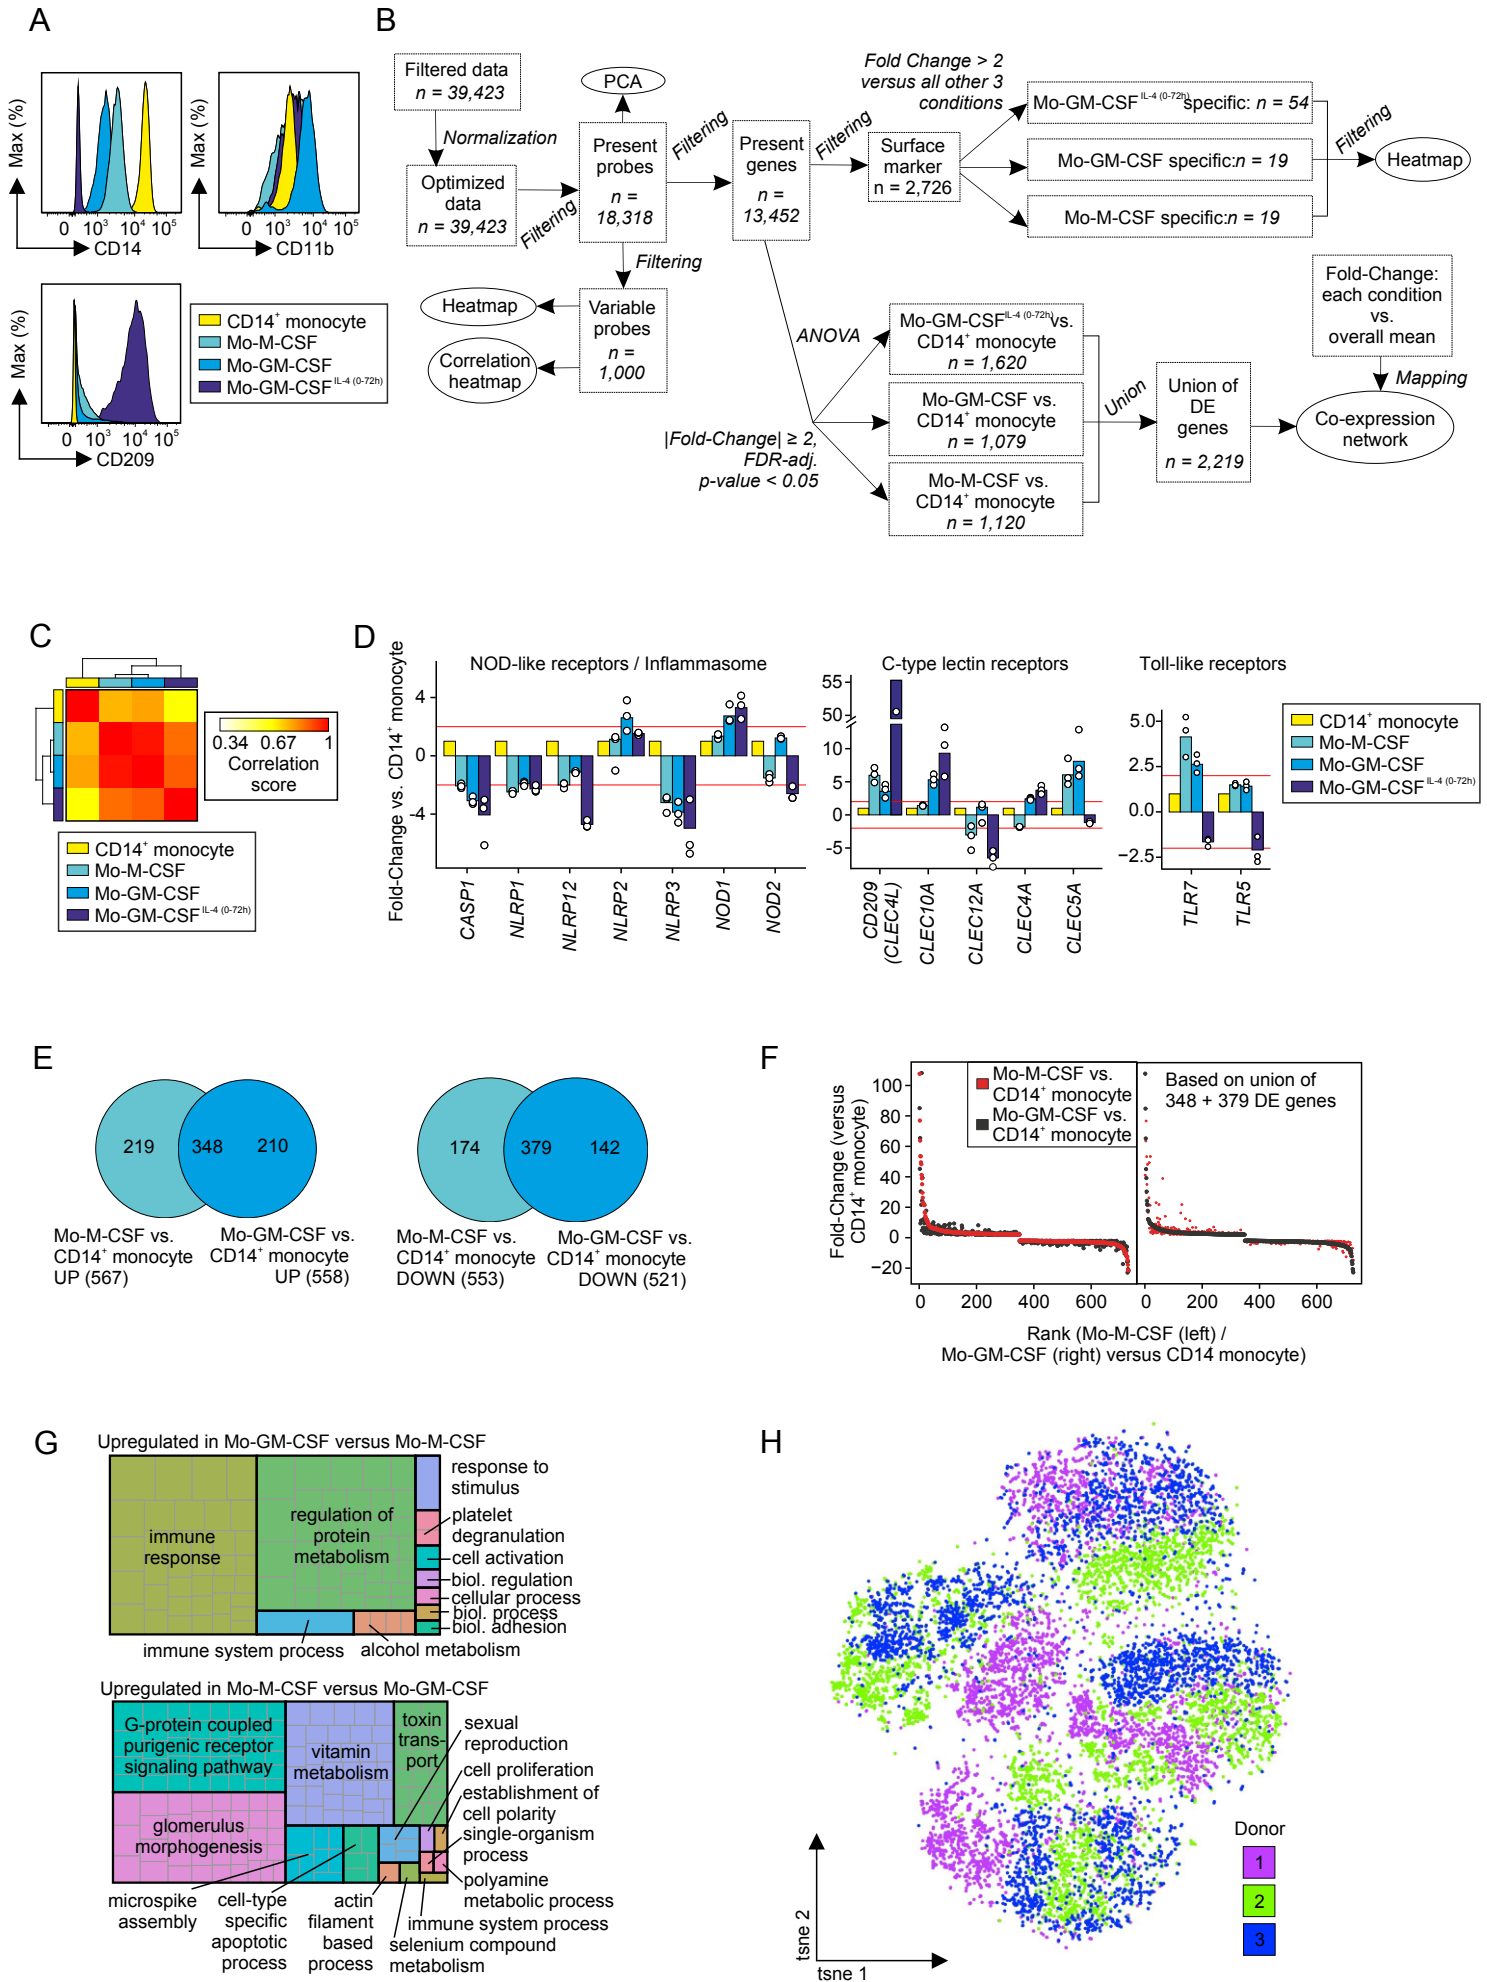

1 **Figure S2 related to Figure 2**  
2 **Mo-GMCSF<sup>IL4(0-72h)</sup> are most distinct from Mo-MCSF and Mo-GMCSF.** (A) Histograms  
3 show relative expression of CD14, CD11b and CD209 on CD14<sup>+</sup> monocytes, Mo-MCSF, Mo-  
4 GMCSF and Mo-GMCSF<sup>IL4(0-72h)</sup> analysed by flow cytometry. Representative data from 4  
5 different donors is shown. (B) Workflow for the major bioinformatic analyses in Figure 2 and  
6 S2. (C) Heatmap visualizing pearson correlation values (pearson correlation coefficient  
7 matrix, PCCM) calculated pairwise between all cell types on the basis of the top 1000 most  
8 variable probes. The color scaling ranges from white (low correlation) via yellow to red (high  
9 correlation). (D) Barplots showing the Fold-Changes for all three monocyte-derived cell types  
10 compared to CD14<sup>+</sup> monocytes for genes encoding NOD-like receptors or being linked to the  
11 inflammasome (top), as well as for genes encoding C-type lectin (bottom left) or Toll-like  
12 (bottom right) receptors. Additionally, the Fold-Changes for all replicates of a single cell type  
13 compared to the mean expression of the CD14<sup>+</sup> monocyte replicates are displayed as dots. (E)  
14 Venn Diagrams of genes being significantly up- (Fold-Change > 2 and FDR-adjusted p-value  
15 < 0.05, top) or down-regulated (Fold-Change < -2 and FDR-adjusted p-value < 0.05, bottom)  
16 in whether Mo-MCSF (left) or Mo-GMCSF (right) compared to CD14<sup>+</sup> monocytes. (F) Rank  
17 plots of genes being significantly up- or downregulated for both Mo-GMCSF and Mo-MCSF  
18 compared to CD14<sup>+</sup> monocytes (union of both overlapping regions demonstrated in E).  
19 Displayed are the ranks (x-axis) of the Fold-Changes compared to CD14<sup>+</sup> monocytes (y-axis),  
20 whether sorted according to Mo-MCSF (top) or Mo-GMCSF (bottom). (G) Tree plot  
21 summarizing significantly enriched (Enrichment p-value < 0.05) biological processes  
22 identified by Gene Ontology Enrichment Analysis (GOEA) for genes being significantly up-  
23 or downregulated (Fold-Change > 2 or < -2 and FDR-adjusted p-value < 0.05) directly  
24 between Mo-GMCSF and Mo-MCSF. (H) *t*-SNE composite dimensions (tsne1 and 2) of  
25 CD14<sup>+</sup> monocytes, Mo-MCSF, Mo-GMCSF and Mo-GMCSF<sup>IL4(0-144h)</sup> analysed by mass  
26 cytometry and colored according to donor identity (n=3).  
27

Supplementary figure 3

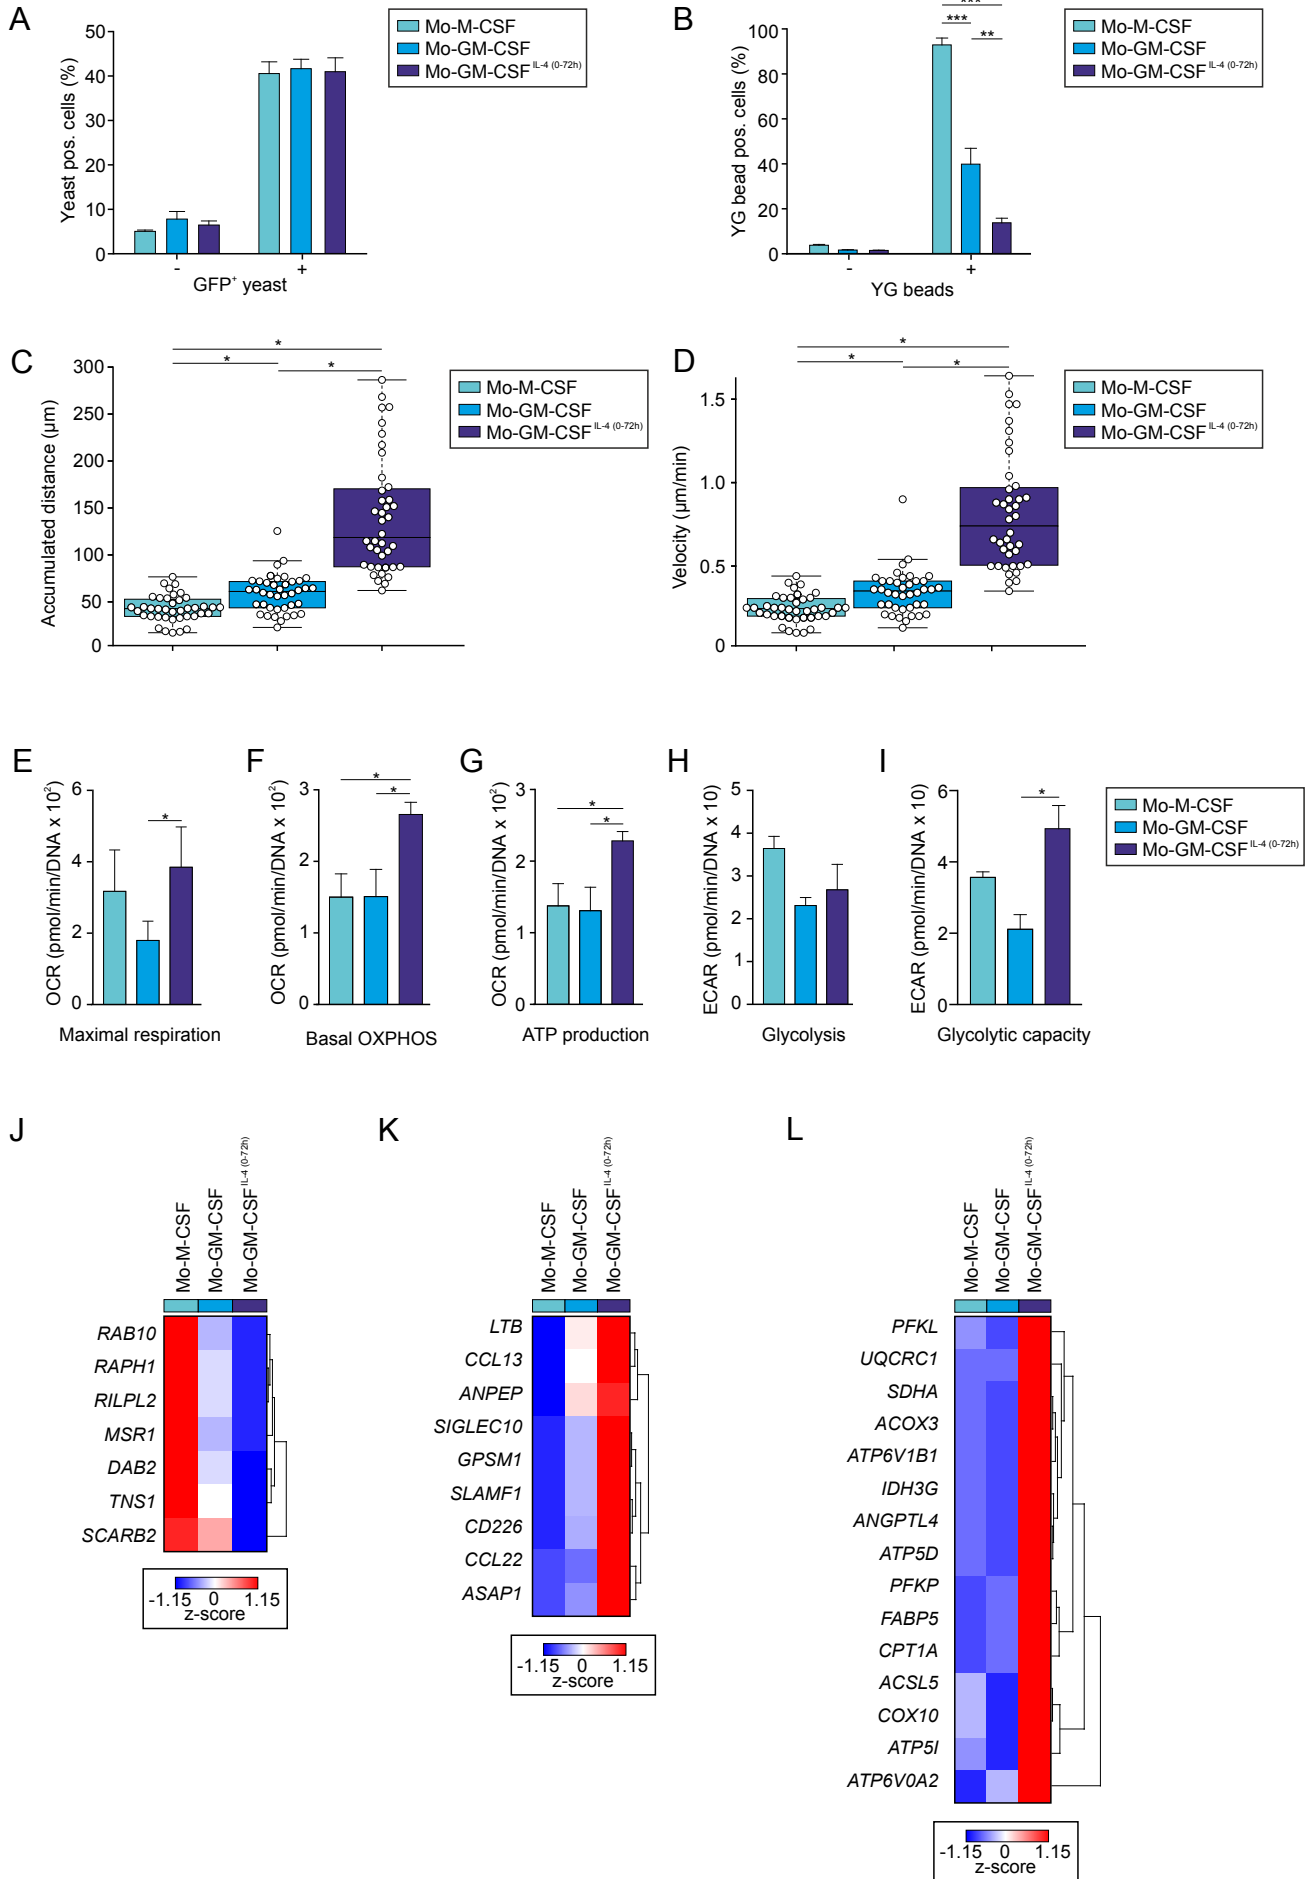

1 **Figure S3 related to Figure 3**

2 **Prediction of activated monocyte functionality.** (A) Quantification of the flow cytometric  
3 analysis of Mo-MCSF, Mo-GMCSF and Mo-GMCSF<sup>IL4(0-72h)</sup> after 1h of incubation with  
4 GFP<sup>+</sup> yeast or without (n=3, mean + SEM). Statistical significance between cell types after 1h  
5 of incubation was determined using one-way RM ANOVA, with  $p > 0.05$ . (B) Quantification  
6 of the flow cytometric analysis of Mo-MCSF, Mo-GMCSF and Mo-GMCSF<sup>IL4(0-72h)</sup> after  
7 4hrs of incubation with YG beads (n=5-6). Statistical significance was determined using one-  
8 way RM ANOVA and Tukey's method for multiple test correction, with  $**p < 0.01$  and  $***p$   
9  $< 0.001$ . (C) Quantification of accumulated distance and (D) average migratory speed  
10 (velocity) of motile Mo-MCSF, Mo-GMCSF and Mo-GMCSF<sup>IL4(0-72h)</sup> corresponding to  
11 **Figure 3C**. Results show one representative experiment out of three. Statistical significance  
12 was determined using Kruskal-Wallis one-way ANOVA on ranks and Tukey's method for  
13 multiple test correction, with  $*p < 0.05$ . (E) Maximal respiration, (F) basal OXPHOS, (G)  
14 ATP synthesis, (H) glycolysis and (I) glycolytic capacity Mo-MCSF, Mo-GMCSF and Mo-  
15 GMCSF<sup>IL4(0-72h)</sup>, respectively. Results are pooled data shown as mean + SEM from n = 3  
16 replicates. Statistical significance was determined using one way ANOVA with  $*p < 0.05$ . (J-  
17 L) Heatmaps of genes being directly or indirectly linked (see supplementary information) to  
18 (J) YG bead uptake, (K) motility or (L) OCR/ECAR, which have expression patterns on the  
19 transcriptional level being analogous to the observed functional outcomes summarized in G.  
20 The log<sub>2</sub>-expression values were z-transformed and scaled to a minimum of -1.15 (blue) and  
21 a maximum of 1.15 (red), respectively.

22

Supplementary figure 4

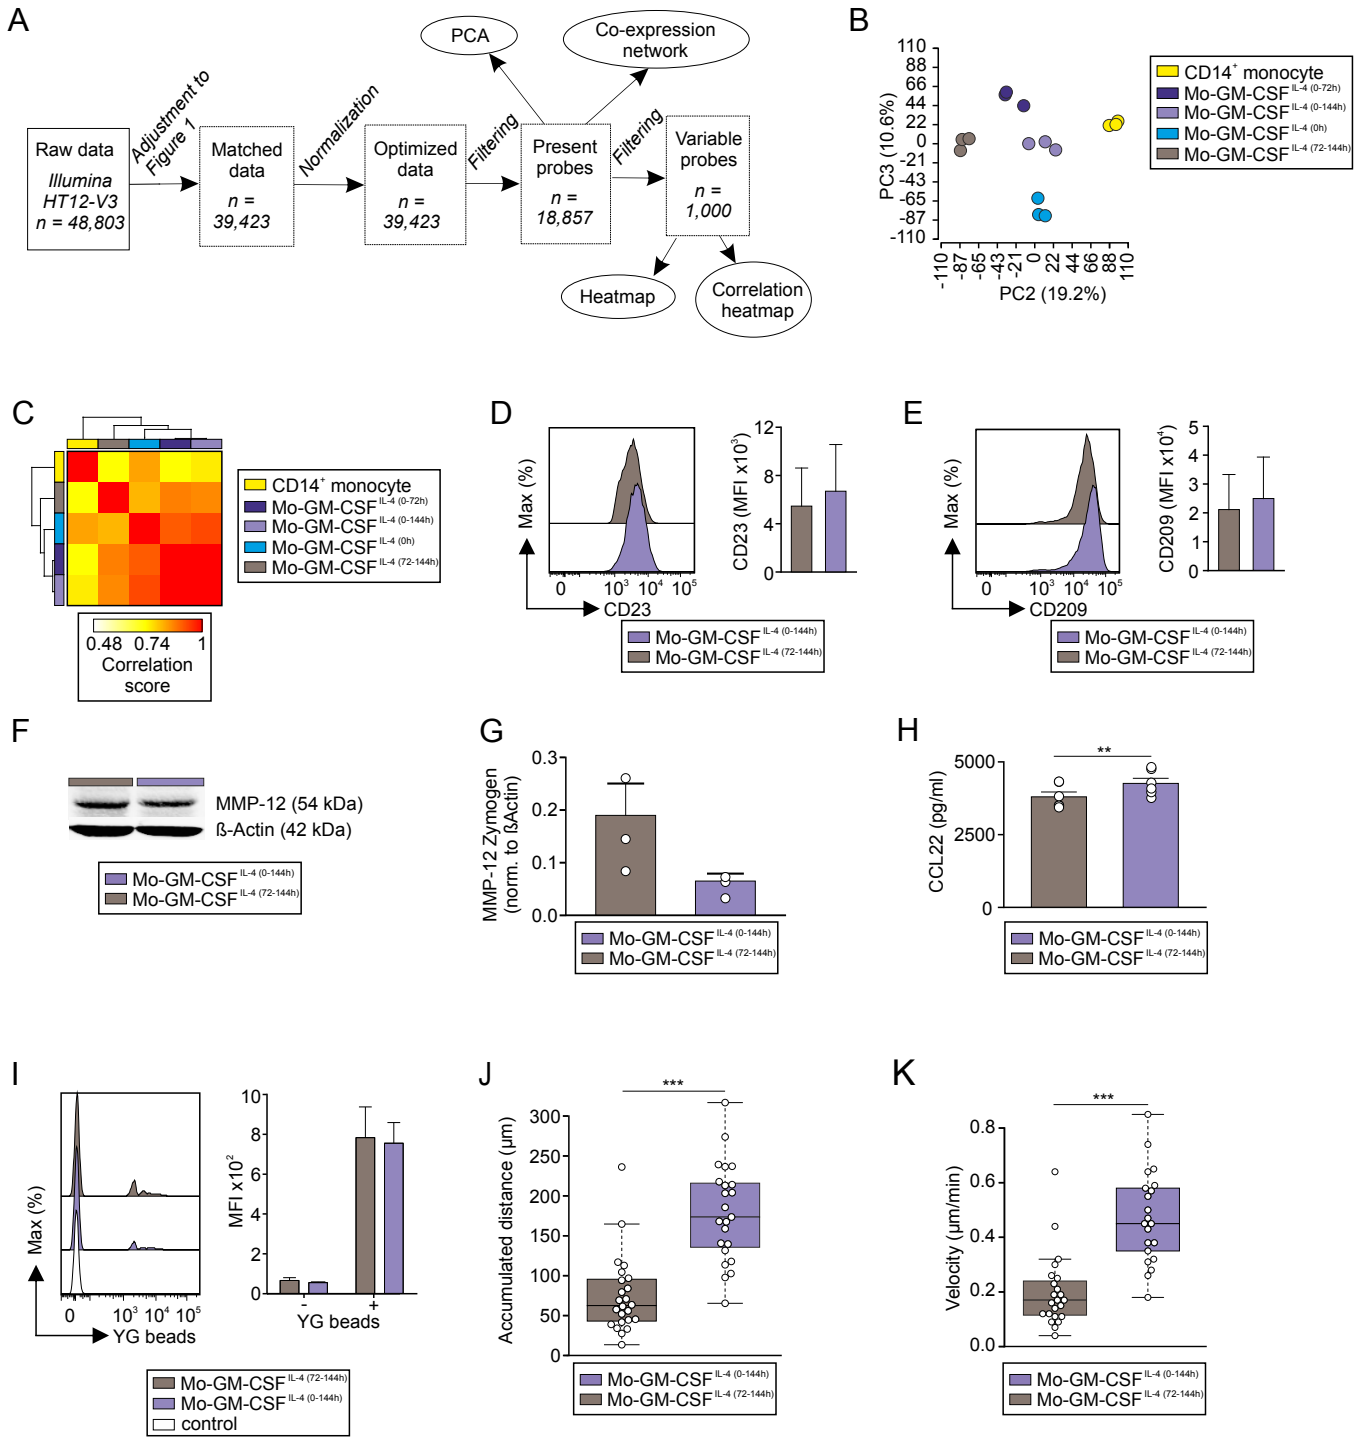



1 **Figure S4 related to Figure 4**  
2 **Mo-GMCSF<sup>IL4(0-144h)</sup> differ from Mo-GMCSF<sup>IL4(72-144h)</sup> monocyte-derived cells. (A)**  
3 Workflow for Figure 4 and S4. **(B)** Principal component analysis (PCAs) based on 18,857  
4 present probes. Principal components (PCs) 2 versus 3 are shown, which account for 19.2%  
5 versus 10.6% of the total variance, respectively. **(C)** Heatmap visualizing pearson correlation  
6 values (pearson correlation coefficient matrix, PCCM) calculated pairwise between all cell  
7 types on the basis of the top 1000 most variable genes. The color scaling ranges from white  
8 (low correlation) via yellow to red (high correlation). **(D-E)** Histograms show relative  
9 expression of **(D)** CD23 and **(E)** CD209 on Mo-GMCSF<sup>(72h-144h)</sup> and Mo-GMCSF<sup>IL4(0-144h)</sup>  
10 analysed by flow cytometry. Bar plots show quantification of the mean fluorescence intensity  
11 (MFI) of the **(D)** CD23 and **(E)** CD209 signal on Mo-GMCSF<sup>(72h-144h)</sup> or Mo-GMCSF<sup>IL4(0-</sup>  
12 <sup>144h)</sup>. Representative data shown (n=3, mean + SEM). Statistical significance was determined  
13 using paired t-test, with  $p = 0.415$  and  $p = 0.399$  for **(D)** and **(E)**, respectively. **(F)**  
14 Representative western blot image of MMP12 and  $\beta$ -Actin protein expression in Mo-  
15 GMCSF<sup>(72h-144h)</sup> or Mo-GMCSF<sup>IL4(0-144h)</sup> (n=3). **(G)** Statistical quantification of MMP12  
16 protein expression normalized to  $\beta$ -Actin in Mo-GMCSF<sup>(72h-144h)</sup> or Mo-GMCSF<sup>IL4(0-144h)</sup>  
17 using western blot (n=3, mean + SEM). Statistical significance was determined using paired t-  
18 test with  $p = 0.229$ . **(H)** Analysis of culture supernatants of Mo-GMCSF<sup>(72h-144h)</sup> or Mo-  
19 GMCSF<sup>IL4(0-144h)</sup> for CCL22 using ELISA (n=6, 3 independent donors, 2 technical  
20 replicates)). Data are shown as mean + SEM. Statistical significance was determined using  
21 paired t-test with  $**p < 0.01$ . **(I)** Flow cytometric analysis of Mo-GMCSF<sup>(72h-144h)</sup> or Mo-  
22 GMCSF<sup>IL4(0-144h)</sup> after 4hrs of incubation with YG beads (n=6, mean + SEM). Statistical  
23 significance between cell types after 4h of incubation was determined using paired t-test with  
24  $p = 0.83$ . **(J)** Quantification of accumulated distance and **(K)** average migratory speed  
25 (velocity) of motile myeloid cells corresponding to Figure 4F. Results show one  
26 representative experiment out of three. Statistical significance was determined using  
27 Student's t-test in **(J)** and Mann-Whitney Rank Sum test in **(K)** with  $***p < 0.001$ .  
28

# Supplementary figure 5

A

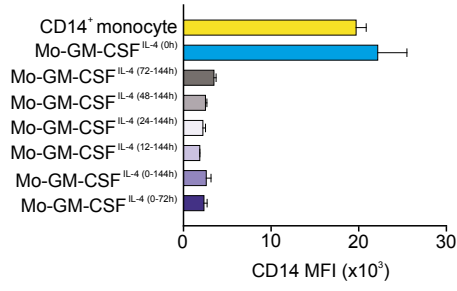

B

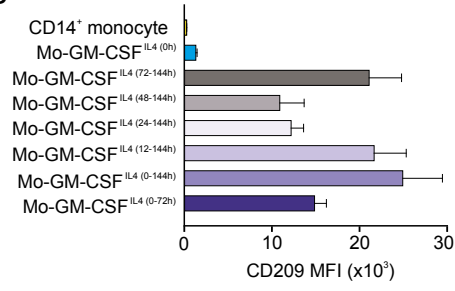

C

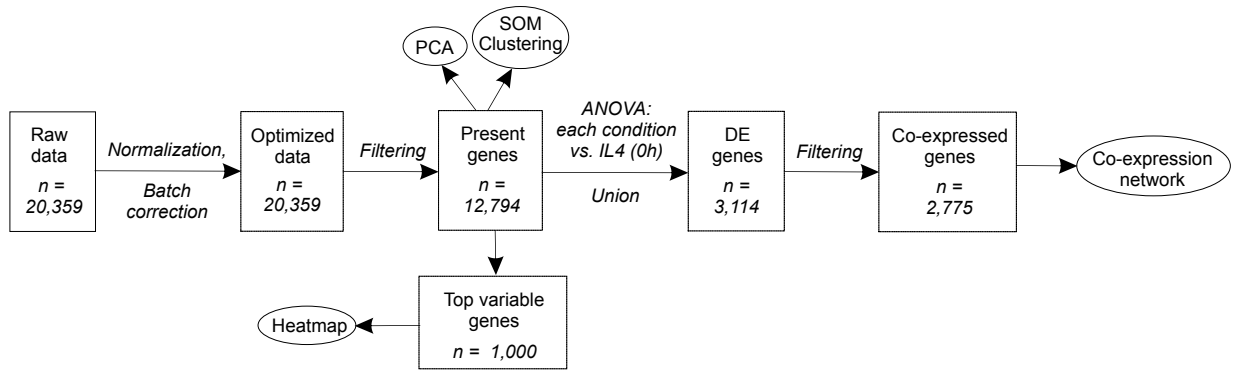

1 **Figure S5 related to Figure 5**

2 **Timing of IL4 determines transcriptional regulation in activated monocytes. (A-B)** Flow

3 cytometric analysis of the MFI of (A) CD14 and (B) CD209 on the depicted cell types (n=4).

4 (C) Workflow for the RNA-Seq data analysis in Figure 5.

5

# Supplementary figure 6

**A**

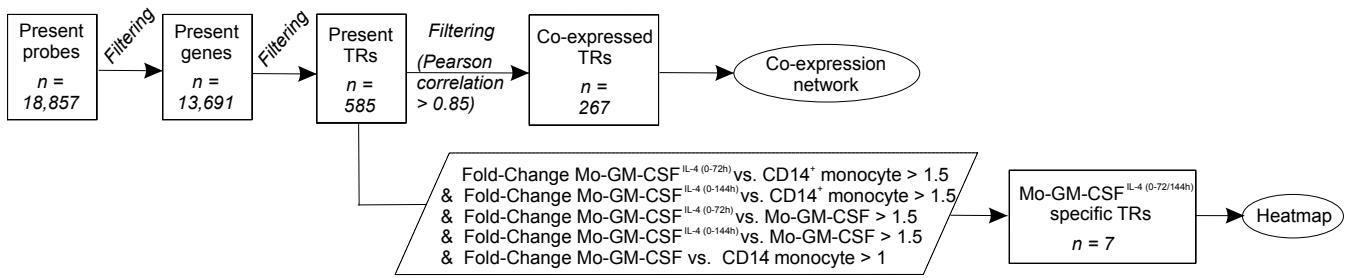

**B**

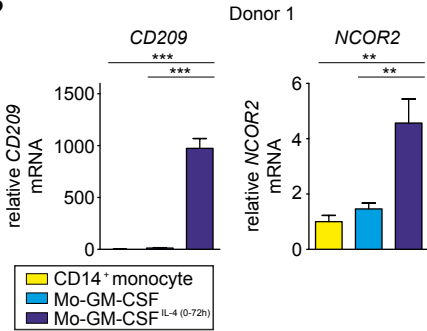

**C**

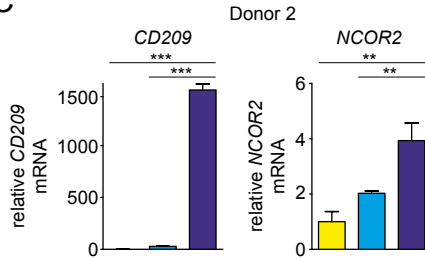

**D**

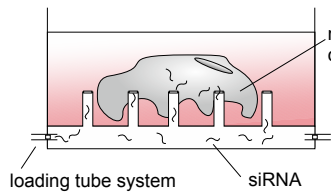

**E**

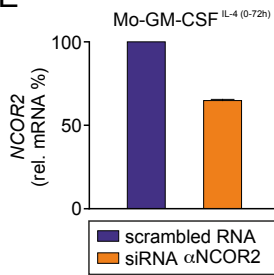

**F**

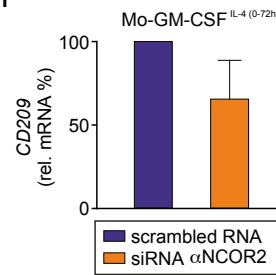

**G**

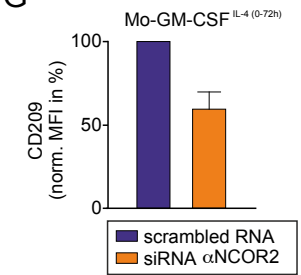

**H**

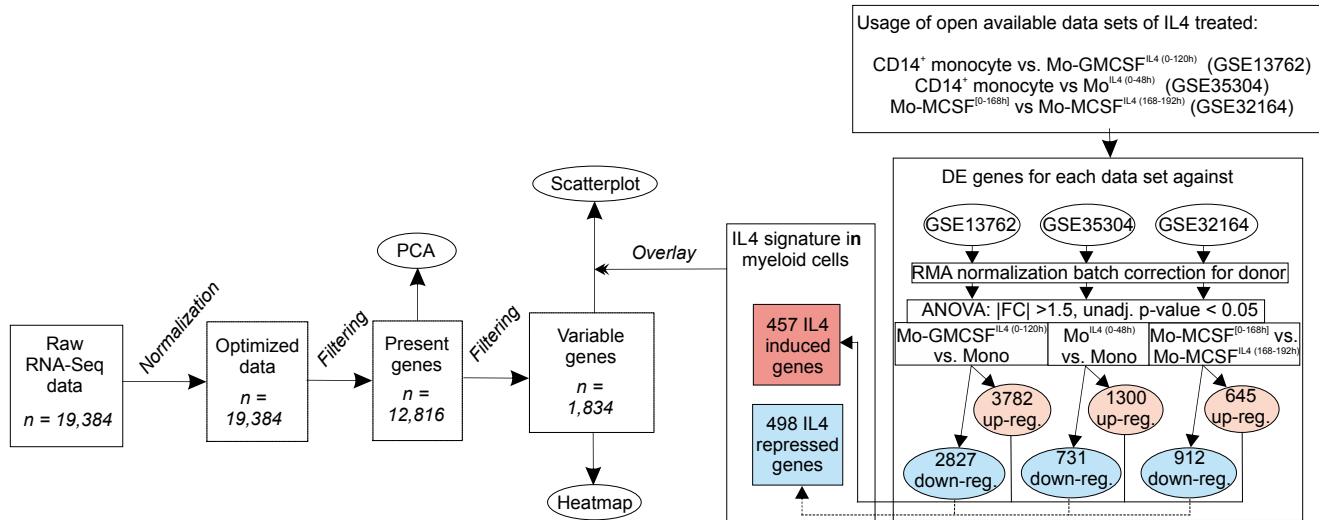

**I**

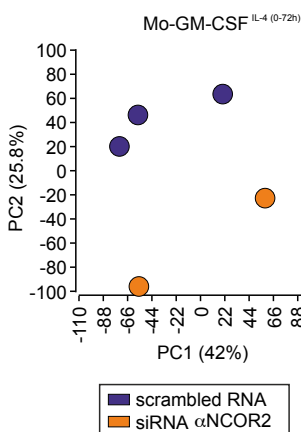

**J**

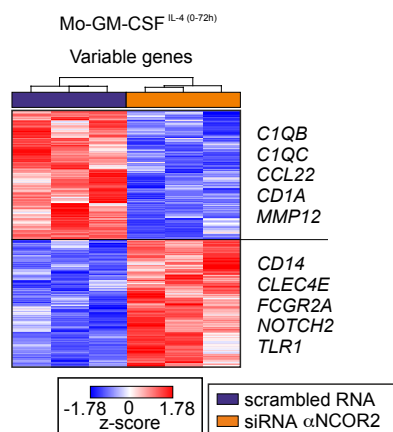

1 **Figure S6 related to Figure 6**  
2 **NCOR2 is a transcriptional regulator of Mo-GMCSF<sup>IL4(0-72/144h)</sup>.** (A) Workflow for Figure  
3 6 and S6. (B) *Realtime* PCR measurement of *NCOR2* and *CD209* mRNA levels relative to  
4 *GAPDH* mRNA levels in Mo-GMCSF and Mo-GMCSF<sup>IL4(0-72h)</sup> in donor 1 (mean + standard  
5 deviation). (C) *Realtime* PCR measurement of *NCOR2* and *CD209* mRNA levels relative to  
6 *GAPDH* mRNA levels in Mo-GMCSF and Mo-GMCSF<sup>IL4(0-72h)</sup> in donor 2 (mean + standard  
7 deviation). (D) Schema for the experimental setup of the siRNA-based gene knockdown. (E)  
8 *Realtime* PCR measurement of *NCOR2* mRNA levels relative to *GAPDH* mRNA levels in  
9 Mo-GMCSF<sup>IL4(0-72h)</sup> (n=2, mean + standard deviation). (F) *Realtime* PCR measurement of  
10 *CD209* mRNA levels relative to *β-Actin* mRNA levels in Mo-GMCSF<sup>IL4(0-72h)</sup> (n = 2, mean +  
11 standard deviation). (G) Quantification of the normalized MFI of CD209 on Mo-GMCSF<sup>IL4(0-  
12 72h)</sup> (n = 2, mean + standard deviation). (H) Workflow for the analysis of the siRNA gene  
13 knockdown dataset. (I) Principal component analysis (PCA) based on 12,816 present genes.  
14 Displayed are principal components (PCs) 1 versus 2, which account for 42% versus 25.8% of  
15 the total variance, respectively. (J) Heatmap of the top 1000 genes being most variable across  
16 the dataset. Rows were ordered based on hierarchical clustering. The expression values were  
17 z-transformed and scaled to a minimum of -1.78 (blue) and a maximum of 1.78 (red). A few  
18 genes of each group are depicted on the right side next to the heatmap.  
19
